# Supplementary material for: Chromosomal microarray testing identifies a 4p terminal region associated with seizures in Wolf–Hirschhorn syndrome
Source: PubMed Central journal article supplement — J Med Genet. 2016 Jan 8;53(4):256–63. doi: 10.1136/jmedgenet-2015-103626 (PMC4819617; doi:10.1136/jmedgenet-2015-103626), 2016-01-08
Supplement: jmedgenet-2015-103626-s1.pdf [file jmedgenet-2015-103626-s1.pdf]

# 4P- SUPPORT GROUP BIOGRAPHICAL INFORMATION

The 4p- Support Group has been collecting and organizing biographical data on individuals with 4p- (Wolf-Hirschhorn Syndrome being the main syndrome) for almost 20 years. This information is transferred to our Bio CD and is updated annually. Additionally, our organization is in beginning stages of building an International Registry. We encourage all parents who have children with 4p- to submit biographical information to us every 2 years. All data is extremely useful, even if your child or adult with 4p- has passed away. International participation is greatly appreciated. The only requirement is that submissions must be sent to us in English.

Currently, the 4p- Support Group is participating in 2 projects to advance the medical community's knowledge of 4p- and Wolf-Hirschhorn Syndrome. By submitting your child's biographical information, you will be helping advance this knowledge. This is called a general data collection and your child will not be named in the research.

Follow the instructions below to submit and/or update your child's biographical file. This information will be released only to Full Members of the 4p- Support Group, and no other use is authorized without your expressed permission.

You have 2 options for submitting the Bio Form.

1. **Preferred Method:** Go to <http://4p-supportgroup.org/biographical-information/>. Save the "Bio Form – Updated 2012" file to your computer's hard drive. Answer questions specifically pertaining to your child. Once completed, email the file to [president@4p-supportgroup.org](mailto:president@4p-supportgroup.org). We also request that you submit up to 2 recent digital photos of your child – which will be included with the biography. You may mail the photos\* to the address below, if you are unable to send it electronically. \*\* Option 1 allows for easy updates and submissions of your child's biography.
2. Go to <http://4p-supportgroup.org/biographical-information/>. Print the "Bio Form – Updated 2012" file. You may also request them to be mailed to you by contacting Amanda Lortz at (740) 936-5095 or [president@4p-supportgroup.org](mailto:president@4p-supportgroup.org). Legibly handwrite your responses to questions specifically pertaining to your child. Please keep your responses brief as they will be entered into an electronic database. We also request that you submit up to 2 recent digital photos of your child – which will be included with the biography. You may mail the photos\* to the address below, if you are unable to send it electronically. Sign your completed survey and return it to our corporate office at the address below.

\*Please note, photos will be kept on file and not returned.

## **Submitting the Consent Form for the growth research:**

The consent forms for our growth research project are available at <http://4p-supportgroup.org/biographical-information/> or you may request them to be mailed to you by contacting Amanda Lortz at (740) 936-5095 or [president@4p-supportgroup.org](mailto:president@4p-supportgroup.org). Sign and submit your consent form via email to [president@4p-supportgroup.org](mailto:president@4p-supportgroup.org) or mail to the address below. You may also fax to (801) 581-8943 Attn: Dr. Amy Calhoun. This is a secure fax. Once we have received your consent, we will sign and return a copy to you for your records.

**4p- Support Group  
c/o Amanda Lortz, President  
131 Green Cook Road  
Sunbury, OH 43074**

## PARENT'S INFORMATION

First & Last Name(s): \_\_\_\_\_ Address: \_\_\_\_\_

City/State (Prov)/ Zip (postal Code)/ Country (non-US): \_\_\_\_\_

Phone: (\_\_\_\_\_) \_\_\_\_\_ Email: \_\_\_\_\_ Website \_\_\_\_\_

Please list siblings and DOB(s): \_\_\_\_\_

Foster parent of this child? \_\_\_\_\_ Adopted? \_\_\_\_\_ Relative? \_\_\_\_\_ Parent's ages (at birth) Father \_\_\_\_\_ Mother \_\_\_\_\_

## 4P- CHILD

Name: \_\_\_\_\_ DOB: \_\_\_\_\_ Birth Weight: \_\_\_\_\_

Birth Length: \_\_\_\_\_ Gestation: \_\_\_\_\_ Born at (City): \_\_\_\_\_ at Hospital: \_\_\_\_\_

Current Age: \_\_\_\_\_ Current weight: \_\_\_\_\_ Current length (height): \_\_\_\_\_

## DIAGNOSTIC INFORMATION

Doctor who ordered chromosome study or laboratory that performed study: \_\_\_\_\_

Date (or age) of diagnosis: \_\_\_\_\_ Report available: \_\_\_ Yes \_\_\_ No

### Results

FISH: \_\_\_\_\_

High resolution: \_\_\_\_\_

Standard resolution: \_\_\_\_\_

Other DNA tests: \_\_\_\_\_

Sporadic/de novo: \_\_\_ Yes \_\_\_ No Translocation: \_\_\_ Yes \_\_\_ No \_\_\_ Unknown If yes, list chromosomes involved: \_\_\_\_\_

Ring Chromosome: \_\_\_ Yes \_\_\_ No \_\_\_ Unknown Inversion: \_\_\_ Yes \_\_\_ No \_\_\_ Unknown

Father's karyotype: \_\_\_\_\_ Mother's karyotype: \_\_\_\_\_

Result: \_\_\_\_\_ Result: \_\_\_\_\_

Doctor who ordered test: \_\_\_\_\_ Doctor who ordered test: \_\_\_\_\_

## RELEASE

I, \_\_\_\_\_ Hereby give my permission (*please list any restrictions*) to release:

\_\_\_\_\_ This information and photo to members of the 4P- Support Group (*Professionals may also see these*).

\_\_\_\_\_ My address/Phone number to members of the 4P- Support Group

Date: \_\_\_\_\_ Signed: \_\_\_\_\_ Relation to 4P- Child \_\_\_\_\_

Restrictions, if any: \_\_\_\_\_

4P- Child's Initials \_\_\_\_\_

**GESTATIONAL/BIRTH**

Decreased fetal movements: \_\_\_Yes\_\_\_No    Comment:\_\_\_\_\_

Decreased amniotic fluid: \_\_\_Yes\_\_\_No    Comment:\_\_\_\_\_

Gestational age of birth:\_\_\_\_\_

**CONGENITAL MALFORMATIONS**

Heart Defect: \_\_\_Yes\_\_\_No    If yes, type:\_\_\_\_\_

Cardiac ultrasound performed: \_\_\_Yes\_\_\_No

If yes, result:\_\_\_\_\_

Renal (kidney) defect: \_\_\_Yes\_\_\_No                      Renal ultrasound performed: \_\_\_Yes\_\_\_No

If yes, result:\_\_\_\_\_

Bladder Defect: \_\_\_Yes\_\_\_No                      Type:\_\_\_\_\_

Vescicoureteral (genitourinary) reflux: \_\_\_Yes\_\_\_No    Type:\_\_\_\_\_

Genital Defect: \_\_\_Yes\_\_\_No                      If male, hypospadias: \_\_\_Yes\_\_\_No                      Cryptorchidism: \_\_\_Yes\_\_\_No

Cleft lip: \_\_\_Yes\_\_\_No                      Bilateral: \_\_\_Yes\_\_\_No                      Unilateral: \_\_\_Yes\_\_\_No

With cleft palate: \_\_\_Yes\_\_\_No                      Cleft palate alone: \_\_\_Yes\_\_\_No

Scalp defect: \_\_\_Yes\_\_\_No    Type:\_\_\_\_\_

Eye defect: \_\_\_Yes\_\_\_No    Type:\_\_\_\_\_

Glasses: \_\_\_Yes\_\_\_No

Ear tags: \_\_\_Yes\_\_\_No                      Ear pits: \_\_\_Yes\_\_\_No

Any other malformations?

Comments on malformations:

**HISTORY OF PNEUMONIAS**

\_\_\_Yes\_\_\_No    If yes, at what ages:\_\_\_\_\_ How many:\_\_\_\_\_

Describe:

**RECURRENT OTITIS (Ear Infections)**

\_\_\_Yes\_\_\_No      If yes, at what ages:\_\_\_\_\_

How many:\_\_\_\_\_

Describe:

**HEARING IMPAIRMENT**

Hearing test done:\_\_\_Yes\_\_\_No      Hearing impairment detected:\_\_\_Yes\_\_\_No

At what age:\_\_\_\_\_      If yes what type:\_\_\_Conductive\_\_\_Neural\_\_\_Sensorineural

Degree of loss:\_\_\_Mild\_\_\_Moderate\_\_\_Severe

Describe:

**FEEDING DIFFICULTIES**

Gastroesophageal reflux:\_\_\_Yes\_\_\_No      Tube feeding:\_\_\_Yes\_\_\_No      N/J tube:\_\_\_Yes\_\_\_No

Gastrostomy/tube placement:\_\_\_Yes\_\_\_No      What age:\_\_\_\_\_

Continuous night time feeds:\_\_\_Yes\_\_\_No      Bolus feeds:\_\_\_Yes\_\_\_No

Describe:

Oral feeds:\_\_\_Yes\_\_\_No      Pureed foods:\_\_\_Yes\_\_\_No      Solid foods:\_\_\_Yes\_\_\_No

Describe:

Swallow study performed:\_\_\_Yes\_\_\_No      Aspiration:\_\_\_Yes\_\_\_No

Describe Results:

**SKELETAL ANOMALIES**

Scoliosis: \_\_\_ Yes \_\_\_ No

Other: \_\_\_ Yes \_\_\_ No

If yes, type:

Skeletal x-rays: \_\_\_ Yes \_\_\_ No

If yes, type:

**ABNORMAL TEETH**

Checked for it: \_\_\_ Yes \_\_\_ No

If yes, describe abnormalities:

**SKIN CHANGES**

\_\_\_ Yes \_\_\_ No

Describe:

**SEIZURES**

Age of onset: \_\_\_\_\_ Triggered by a fever: \_\_\_ Yes \_\_\_ No Triggered by a vaccination: \_\_\_ Yes \_\_\_ No

Describe:

What types of seizures has your child had:

- \_\_\_ Tonic-Clonic      \_\_\_ Tonic      \_\_\_ Clonic      \_\_\_ Myoclonic      \_\_\_ Absence
- \_\_\_ Atonic      \_\_\_ Complex Partial      \_\_\_ Simple Partial      \_\_\_ Atypical      \_\_\_ Status Epilepticus

Medication used to stop Status Epilepticus: \_\_\_\_\_

Diagnosed Epileptic Syndrome: \_\_\_ Yes \_\_\_ No      If yes, type: \_\_\_\_\_

EEG performed: \_\_\_Yes\_\_\_No      CT scan performed: \_\_\_Yes\_\_\_No      MRI performed: \_\_\_Yes\_\_\_No

Describe:

Medications used or have been used and their effectiveness for your child's seizures:

Other non-medication treatments for seizures: \_\_\_Yes\_\_\_No

Describe:

Other Comments:

**SLEEP ABNORMALITIES**

How long did/does your child sleep at night:

Does/did she/he wake up frequently during the night: \_\_\_Yes\_\_\_No      If yes, what time: \_\_\_\_\_

When awake at night, what does/did she/he do:

If sleep disturbances were present, at what age did they settle: \_\_\_\_\_

Medications used: \_\_\_\_\_

4P- Child's Initials \_\_\_\_\_

**DEVELOPMENT**

Please record the age at acquiring the following milestones, if applicable.

Smiles: \_\_\_\_\_ Sits up: \_\_\_\_\_ Stands: \_\_\_\_\_ Helps to dress: \_\_\_\_\_

Walks with support: \_\_\_\_\_ Walks w/o support: \_\_\_\_\_ Runs: \_\_\_\_\_ Feeds self: \_\_\_\_\_

Climbs stairs: \_\_\_\_\_ First words: \_\_\_\_\_ Joins 2 or 3 words to make a sentence: \_\_\_\_\_

Toilet control during the day: \_\_\_\_\_ Toilet control during the night: \_\_\_\_\_

What are the present cognitive abilities (IQ or functioning age level): \_\_\_\_\_

Psychological testing: \_\_\_ Yes \_\_\_ No

Describe:

Describe your child's current school program:

Is or has your child received the following therapies: \_\_\_ PT \_\_\_ OT \_\_\_ Speech

Others, describe: \_\_\_\_\_

How is his/her comprehension:

**PERSONALITY**

**SURGERIES**

Please list all of the surgeries that your child has had, the reason for surgery, the type of procedure and the age at the time of the surgery.

**OTHER COMMENTS**

# Growth Data

Please complete as much of the chart as you are able. You can obtain your child's measurements by contacting his or her primary physician. You may also, if you prefer, directly attach a copy of your child's formal growth chart from his or her primary physician.

| <i>Age</i>       | <i>Date of measurement (if known)</i> | <i>Weight (pounds and ounces)</i> | <i>Length (inches)</i> | <i>Head Circumference (centimeters)</i> |
|------------------|---------------------------------------|-----------------------------------|------------------------|-----------------------------------------|
| <i>Birth</i>     |                                       |                                   |                        |                                         |
| <i>1 week</i>    |                                       |                                   |                        |                                         |
| <i>1 month</i>   |                                       |                                   |                        |                                         |
| <i>2 months</i>  |                                       |                                   |                        |                                         |
| <i>3 months</i>  |                                       |                                   |                        |                                         |
| <i>4 months</i>  |                                       |                                   |                        |                                         |
| <i>5 months</i>  |                                       |                                   |                        |                                         |
| <i>6 months</i>  |                                       |                                   |                        |                                         |
| <i>7 months</i>  |                                       |                                   |                        |                                         |
| <i>8 months</i>  |                                       |                                   |                        |                                         |
| <i>9 months</i>  |                                       |                                   |                        |                                         |
| <i>10 months</i> |                                       |                                   |                        |                                         |
| <i>11 months</i> |                                       |                                   |                        |                                         |
| <i>1 year</i>    |                                       |                                   |                        |                                         |
| <i>2 years</i>   |                                       |                                   |                        |                                         |
| <i>3 years</i>   |                                       |                                   |                        |                                         |
| <i>4 years</i>   |                                       |                                   |                        |                                         |
| <i>5 years</i>   |                                       |                                   |                        |                                         |
| <i>6 years</i>   |                                       |                                   |                        |                                         |
| <i>7 years</i>   |                                       |                                   |                        |                                         |
| <i>8 years</i>   |                                       |                                   |                        |                                         |
| <i>9 years</i>   |                                       |                                   |                        |                                         |
| <i>10 years</i>  |                                       |                                   |                        |                                         |
| <i>11 years</i>  |                                       |                                   |                        |                                         |
| <i>12 years</i>  |                                       |                                   |                        |                                         |
| <i>13 years</i>  |                                       |                                   |                        |                                         |
| <i>14 years</i>  |                                       |                                   |                        |                                         |
| <i>15 years</i>  |                                       |                                   |                        |                                         |
| <i>16 years</i>  |                                       |                                   |                        |                                         |
| <i>17 years</i>  |                                       |                                   |                        |                                         |
| <i>18 years</i>  |                                       |                                   |                        |                                         |
| <i>19 years</i>  |                                       |                                   |                        |                                         |
| <i>20 years</i>  |                                       |                                   |                        |                                         |
| <i>30 years</i>  |                                       |                                   |                        |                                         |
| <i>40 years</i>  |                                       |                                   |                        |                                         |
| <i>50 years</i>  |                                       |                                   |                        |                                         |
| <i>60 years</i>  |                                       |                                   |                        |                                         |
