# Supplementary material for: Chromosomal microarray testing identifies a 4p terminal region associated with seizures in Wolf–Hirschhorn syndrome
Source: PubMed Central journal article supplement — J Med Genet. 2016 Jan 8;53(4):256–63. doi: 10.1136/jmedgenet-2015-103626 (PMC4819617; doi:10.1136/jmedgenet-2015-103626), 2016-01-08
Supplement: jmedgenet-2015-103626-s2.pdf [file jmedgenet-2015-103626-s2.pdf]

**Table S1. CNV breakpoints, gender, age at time of analysis, age of seizure onset, and AEDs for individuals with 4p deletions and no other clinically reportable CNVs (henceforth designated “individuals with only 4p deletions.”). All coordinates are given in hg19/GRCh37.**

| Patient | CNV coordinates (hg19) | Deletion size (Mbp) | Gender | Age (years) | Seizures: age of onset (months) | Seizure medications (AEDs)                                                                                            |
|---------|------------------------|---------------------|--------|-------------|---------------------------------|-----------------------------------------------------------------------------------------------------------------------|
| 1       | chr4: 68345-32587789   | 32.5                | F      | 3.8         | 5                               | Phenobarbital                                                                                                         |
| 2       | chr4: 68345-22799761   | 22.7                | F      | 14.8        | 11                              | For SE: Diazepam.<br>Carbamazepine, Topiramate                                                                        |
| 3       | chr4: 68345-19797868   | 19.7                | M      | 7.2         | 5                               | Diazepam and Lorazepam for SE.<br>Levetiracetam, Topiramate, and<br>Clonazepam in combination.<br>Levetiracetam only. |
| 4       | chr4: 68345-19258986   | 19.2                | M      | 16.5        | 6                               | Chlorazepate Dipotassium and<br>Lacosamide and “many others.”                                                         |
| 5       | chr4: 68345-18958105   | 18.9                | F      | 2.8         | 16                              | For SE: Levetiracetam, Diazepam,<br>rectal Diazepam. For seizure<br>control: Levetiracetam, rectal<br>Diazepam        |
| 6       | chr4: 68345-16452492   | 16.4                | F      | 38.0        | 5                               | Phenobarbital, Valproate.<br>Weaned off all seizure meds at                                                           |

|    |                        |      |   |      |                        |                                                                                                                                             |
|----|------------------------|------|---|------|------------------------|---------------------------------------------------------------------------------------------------------------------------------------------|
|    |                        |      |   |      |                        | age 21                                                                                                                                      |
| 7  | chr4: 68345-15891049   | 15.8 | F | 8.0  | 17                     | Phenobarbital, Diazepam. Has been seizure free for past two years. Ketogenic diet.                                                          |
| 8  | chr4: 68345-15338783   | 15.3 | M | 4.0  | No answer <sup>1</sup> | Lamotrigine                                                                                                                                 |
| 9  | chr4: 68345-15067905   | 15.0 | F | 26.5 | 14                     | Phenobarbital, Valproic acid.                                                                                                               |
| 10 | chr4: 1025119-15582327 | 14.6 | M | 3.7  | 18                     | Advised not to medicate due to lack of seizures.                                                                                            |
| 11 | chr4: 68345-13578589   | 13.5 | F | 20.5 | 8                      | Diazepam for SE. Phenobarbital, Phenobarbital/Valproate, Valproate/Clonazepam, Valproate/Levitiracetam, Levitiracetam only since July 2006. |
| 12 | chr4: 49450-11487322   | 11.4 | F | 1.0  | No answer <sup>1</sup> | Levitiracetam, Valproate, Levocarnitine                                                                                                     |
| 13 | chr4: 68345-10621914   | 10.6 | F | 7.5  | 9                      | Topiramate, Levitiracetam, Lamotrigine. Phenobarbital                                                                                       |
| 14 | chr4: 68345-10255806   | 10.2 | F | 5.0  | 6                      | Diazepam, Midazolam, Propanolol for SE. Phenobarbital, Clonazepam, Oxcarbazepine,                                                           |

|    |                       |     |   |      |                        |                                                                                                                                                   |
|----|-----------------------|-----|---|------|------------------------|---------------------------------------------------------------------------------------------------------------------------------------------------|
|    |                       |     |   |      |                        | Clonazepam, Ethosuximide, Gabapentin, Phenytoin, Valproic acid, Felbamate, Topiramate, Zonisamide, Lacosamide, Levetiracetam. Clobazam Lorazepam. |
| 15 | chr4: 68345-9785068   | 9.7 | F | 9.0  | 16                     | For SE: Lorazepam, Diazepam, Phenytoin. For other seizures: Carbamazepine, Levetiracetam. Seizure free for three years                            |
| 16 | chr4: 68345-7670607   | 7.6 | M | 6.0  | No answer <sup>1</sup> | No answer                                                                                                                                         |
| 17 | chr4: 965069-7686694  | 6.7 | M | 1.5  | n/a <sup>2</sup>       | n/a                                                                                                                                               |
| 18 | chr4: 68345-6335151   | 6.3 | F | 2.3  | 14                     | Levetiracetam, Diazepam                                                                                                                           |
| 19 | chr4: 68345-6146360   | 6.1 | F | 3.5  | 9                      | Diazepam, Docosahexaenoic acid                                                                                                                    |
| 20 | chr4: 68345-5595216   | 5.5 | F | 22.0 | No answer <sup>1</sup> | Phenobarbital, Valproate from 24 mo to 7 yr                                                                                                       |
| 21 | chr4: 1701018-7102682 | 5.4 | F | 10.0 | n/a <sup>2</sup>       | n/a                                                                                                                                               |
| 22 | chr4: 68345-5418070   | 5.3 | F | 18.0 | 11                     | Carbamazepine                                                                                                                                     |

|           |                       |     |   |      |                        |                                                                                             |
|-----------|-----------------------|-----|---|------|------------------------|---------------------------------------------------------------------------------------------|
| <b>23</b> | chr4: 113981-5087478  | 5.0 | M | 11.0 | 12                     | Diazepam in case of emergency<br>but never used                                             |
| <b>24</b> | chr4: 1682255-6055232 | 4.4 | M | 8.0  | n/a <sup>2</sup>       | n/a                                                                                         |
| <b>25</b> | chr4: 68345-4426571   | 4.4 | M | 15.0 | 24                     | No answer                                                                                   |
| <b>26</b> | chr4: 68345-4288168   | 4.2 | M | 20.0 | 24                     | No answer                                                                                   |
| <b>27</b> | chr4: 68345-4214933   | 4.1 | M | 5.0  | 42                     | Levetiracetam                                                                               |
| <b>28</b> | chr4: 68345-3956051   | 3.9 | F | 5.0  | 10                     | Diazepam                                                                                    |
| <b>29</b> | chr4: 68345-2283825   | 2.2 | F | 6.7  | No answer <sup>1</sup> | Levetiracetam, Topiramate,<br>Lamotrigine, Lorazepam,<br>Clonazepam, Phenytoin,<br>Diazepam |
| <b>30</b> | chr4: 68345-2115175   | 2.0 | F | 9.0  | No answer <sup>1</sup> | Levetiracetam, Lamotrigine<br>Phenobarbitol                                                 |
| <b>31</b> | chr4: 68345-2110649   | 2.0 | M | 11.3 | No answer <sup>1</sup> | Valproate                                                                                   |
| <b>32</b> | chr4: 68345-2009432   | 1.9 | F | 15.0 | No answer <sup>1</sup> | Topiramate, Levetiracetam,<br>Clobazam, Ketogenic diet                                      |

|           |                      |                      |   |      |                                                   |                                                                                                         |
|-----------|----------------------|----------------------|---|------|---------------------------------------------------|---------------------------------------------------------------------------------------------------------|
| <b>33</b> | chr4: 68345-1740152  | 1.7                  | F | 6.0  | No answer <sup>1</sup>                            | Topiramate, Oxcarbazepine,<br>Lamotrigine, Levetiracetam,<br>Valproic Acid, Ketogenic diet,<br>Diazepam |
| <b>34</b> | chr4: 750979-2009432 | 1.3                  | F | 11.0 | n/a <sup>2</sup>                                  | n/a                                                                                                     |
|           |                      | Average size:<br>9.6 |   |      | Average age of<br>onset (months):<br>13.4 +/- 8.7 |                                                                                                         |

<sup>1</sup>Age of onset was not provided; patient is known to have seizures. <sup>2</sup>Patient does not have seizures, therefore age of onset is not applicable (n/a). SE, status epilepticus.

**Table S2. CNV breakpoints, gender, age at time of study, and age of seizure onset for individuals with a 4p deletion and a second clinically reportable CNV. All coordinates are given in hg19/GRCh37.**

| Patient | 4p CNV coordinates (hg19) | 4p deletion size (Mbp) | Additional CNV coordinates (hg19) <sup>1</sup> | Additional CNV size (Mbp) | Pathogenicity of second CNV                                                                                                                                                                                                          | Sex | Age (years) | Age at seizure onset (months <sup>2</sup> )      | Seizure medications (AEDs)                                                              |
|---------|---------------------------|------------------------|------------------------------------------------|---------------------------|--------------------------------------------------------------------------------------------------------------------------------------------------------------------------------------------------------------------------------------|-----|-------------|--------------------------------------------------|-----------------------------------------------------------------------------------------|
| 35      | chr4:68345-33934217       | 33.9                   | chr19:56455446-57033092 (dup)                  | 0.58                      | VOUS                                                                                                                                                                                                                                 | F   | 0.9         | 6                                                | Levitiracetam                                                                           |
| 36      | chr4:68345-23113681       | 23.0                   | chr2:110873834-110980107 (del)                 | 0.11                      | VOUS; Joubert carrier due to <i>NPHP1</i> deletion                                                                                                                                                                                   | F   | 27.0        | 16 years old, initially associated with menarche | For SE: rectal Diazepam. Remains on Valproate but has not had seizure for several years |
| 37      | chr4:68345-22970801       | 22.9                   | chr16:21931247-22442007 (del)                  | 0.51                      | Pathogenic: 16p12.2 microdeletion syndrome. This syndrome is associated with high penetrance and variable expressivity and includes the following: DD, ID, autism, microcephaly, congenital heart defects, hypotonia, seizures.[2–6] | M   | 4.5         |                                                  | Levitiracetam, Topiramate                                                               |
| 38      | chr4:68345-21981129       | 21.9                   | chr1:246840624-249224684 (dup)                 | 2.4                       | VOUS: case reports associate 1q44 trisomy with ID, speech delay, facial features, heart defects, macrocephaly, ASD,                                                                                                                  | M   | 23.0        | 9                                                | ATCH injections for infantile spasms, Diazepam for SE. Clonazepam,                      |

|    |                       |      |                              |      |                                                                                                                                                                                           |   |      |    |                                                                                                                                                                                                          |
|----|-----------------------|------|------------------------------|------|-------------------------------------------------------------------------------------------------------------------------------------------------------------------------------------------|---|------|----|----------------------------------------------------------------------------------------------------------------------------------------------------------------------------------------------------------|
|    |                       |      |                              |      | seizures[7,8]AM                                                                                                                                                                           |   |      |    | Topiramate,<br>Lamotrigine,<br>Diazepam, Phenytoin,<br>Phenobarbital,<br>Levetiracetam,<br>Tiagabine, Gabapentin,<br>Carbamazepine                                                                       |
| 39 | chr4:5762133-26720441 | 21.0 | chr4:5488819-5760770 (dup)   | 0.27 | VOUS: This is a duplication adjacent and distal to the deletion in 4p16.1. NB: Due to the CMA results, this individual's diagnosis was changed from WHS to proximal 4p deletion syndrome. | M | 25.0 | 18 | Valproate                                                                                                                                                                                                |
| 40 | chr4:68345-17983528   | 17.9 | chr4:17983558-18562949 (dup) | 0.58 | VOUS, likely benign                                                                                                                                                                       | M | 6.7  | 6  | Lorazepam for SE.<br>Valproate, Rufinamide,<br>Clonazepam,<br>Levetiracetam,<br>Phenobarbital,<br>Primidone, Topiramate,<br>Lorazepam, Diazepam,<br>Clobazam, Vigabatrin,<br>Zonisamide, Ketogenic diet. |
| 41 | chr4:68345-15305951   | 15.2 | chr4:15310408-17226923 (dup) | 1.9  | VOUS                                                                                                                                                                                      | F | 14.0 | 8  | Topiramate and<br>Clonazepam for SE.<br>Phenobarbital,<br>Clonazepam,<br>Carbamazepine,<br>Topiramate                                                                                                    |
| 42 | chr4:68345-           | 9.4  | chr8:158048-                 | 7.0  | VOUS                                                                                                                                                                                      | M | 20.0 | 7  | Diazepam, and<br>Lorazepam for SE.                                                                                                                                                                       |

|    |                    |     |                                |       |                                                                                                                                                         |   |      |           |                                                                                                                                                   |
|----|--------------------|-----|--------------------------------|-------|---------------------------------------------------------------------------------------------------------------------------------------------------------|---|------|-----------|---------------------------------------------------------------------------------------------------------------------------------------------------|
|    | 9501651            |     | 7112571 (dup)                  |       |                                                                                                                                                         |   |      |           | Phenytoin, Phenobarbital, Valproate, Carbamazepine. Has been off seizure meds since age 15                                                        |
| 43 | chr4:68345-7442049 | 7.4 | chr8:146082484-146295771 (dup) | 0.21  | VOUS                                                                                                                                                    | M | 12.0 | 9         | Diazepam, Fosphenytoin for SE. Phenytoin, Topiramate, Clonazepam, Lamotrigine, Carbamazepine, Phenobarbital, Valproate, Zonisamide, Oxcarbazepine |
| 44 | chr4:68345-6257188 | 6.2 | chr3:124342797-124394169 (del) | 0.051 | VOUS; Deletion includes the <i>KALRN</i> gene[9]AM                                                                                                      | M | 5.0  | 12        | Valproic acid                                                                                                                                     |
| 45 | chr4:68345-4165335 | 4.1 | chr8:158048-6999114 (dup)      | 6.8   | VOUS                                                                                                                                                    | M | 2.0  | 16        | Valproic acid                                                                                                                                     |
| 46 | chr4:68345-3941740 | 3.9 | chr12:173786-8393815 (dup)     | 8.2   | Pathogenic: 12p trisomy syndrome. 12p trisomy syndrome is characterized by seizures, DD, and hypotonia, unique facial features , and hearing loss[10]AM | F | 3.0  | No answer | Diazepam, Clobazam, Vigabatrin                                                                                                                    |
| 47 | chr4:68345-3927887 | 3.9 | chr12:173786-8393815 (dup)     | 8.2   | Pathogenic: 12p trisomy syndrome. 12p trisomy syndrome is characterized by seizures, DD, and hypotonia, unique facial features , and hearing loss[10]AM | F | 19.5 | 8         | Diazepam, Phenobarbital, Phenytoin, Levitracetam, Valproic acid with Phenytoin, Topiramate                                                        |

|    |                    |                                            |                               |                                              |                                                                                        |   |      |                                                                                    |                                 |
|----|--------------------|--------------------------------------------|-------------------------------|----------------------------------------------|----------------------------------------------------------------------------------------|---|------|------------------------------------------------------------------------------------|---------------------------------|
| 48 | chr4:68345-2437290 | 2.4                                        | chr22:42932261-51197838 (dup) | 8.3                                          | Pathogenic: Phelan-McDermid Syndrome. DD, hypotonia, ASD, and absent or delayed speech | F | 22.0 | 15                                                                                 | Lorazepam for SE, Levitiracetam |
|    |                    | Average size of 4p deletion (Mbp):<br>13.8 |                               | Average size of additional CNV (Mbp):<br>3.2 |                                                                                        |   |      | Average age of onset (months), excluding Patient 36 as an outlier:<br>10.4 +/- 4.2 |                                 |

<sup>1</sup>For additional CNVs, deletion (del) or duplication (dup) of the region is indicated in parentheses following the CNV coordinates. <sup>2</sup>Age of seizure onset of Patient 36 is given in years. Abbreviations: VOUS, variant of unknown significance, ABN, abnormal CNV, ID, intellectual disability, DD, developmental delay, ASD, autism spectrum disorder

**Table S3: Calculation of Two-tailed Fisher's Exact test**

|               |                                |                                 |
|---------------|--------------------------------|---------------------------------|
|               | 751 kbp terminal region intact | 751 kbp terminal region deleted |
| Seizures: No  | 5                              | 0                               |
| Seizures: Yes | 0                              | 29                              |

**Table S4. Coordinates for all deletions helping to define a seizure susceptibility region (see Figure 1b).** “SEIZURE REGION” is the candidate 197 kbp seizure susceptibility region, the SRO between patients described in Izumi et al (2010) and Zollino et al 2014). WHS Critical regions are labeled “WHSCR” and “WHSCR2,” respectively. Patient identifiers are in parentheses and correspond to the number given to them in their respective papers (cited). For example, “Zollino 2014 (3 and 4)” is the label for deletion shared by siblings, patients 3 and 4 in Zollino et al., 2014[11]. All coordinates are given in hg19/GRCh37. Some deletion sizes from older reports had to be inferred because the mapping of breakpoints was done using FISH probes and not by microarray analysis.

|                            | <b>Coordinates</b>   | <b>Seizures?</b> |
|----------------------------|----------------------|------------------|
| SEIZURE REGION             | chr4:367691-564593   |                  |
| Izumi 2010[12]             | chr4: 367691-1948108 | Yes              |
| Zollino 2014 (3 and 4)[11] | chr4:71552-564593    | Yes              |

|                                |                       |    |
|--------------------------------|-----------------------|----|
| Van Buggenhout 2004<br>(6)[13] | chr4:0-300000         | No |
| 34                             | chr4:750979-2009432   | No |
| 18                             | chr4:965069-7686694   | No |
| 10                             | chr4:1025119-15582327 | No |
| Zollino 2014 (2)[11]           | chr4:1079721-1919855  | No |
| Van Buggenhout 2004<br>(3)[13] | chr4:1283478-2833478  | No |
| Shimizu 2013 (13)[14]          | chr4:1339023-10645858 | No |
| 24                             | chr4:1682255-6055232  | No |
| 21                             | chr4:1701018-7102682  | No |
| Andersen 2014 (1)[15]          | chr4:1743630-2120247  | No |
| Zollino 2014 (1)[11]           | chr4:1778765-2909499  | No |
| Okamoto 2013[16]               | chr4:1822203-1931042  | No |

|                             |                       |     |
|-----------------------------|-----------------------|-----|
| Andersen 2014 (2)[15]       | chr4:1827029-1997169  | No  |
| Andersen 2014 (3)[15]       | chr4:1828867-3724595  | No  |
| Van Buggenhout 2004 (4)[13] | chr4:1880226-3505324  | No  |
| Rauch 2001[17]              | chr4:1906575-2093987  | No  |
| Maas 2008 (17)[18]          | chr4:2700000-14800000 | No  |
| Van Buggenhout 2004 (1)[13] | chr4:0-3679582        | No  |
| Van Buggenhout 2004 (5)[13] | chr4:0-3505324        | Yes |
| Van Buggenhout 2004 (2)[13] | chr4:0-2351677        | Yes |
| Bayindir 2013[19]           | chr4:68345-1729442    | Yes |
| 33                          | chr4:68345-1740152    | Yes |
| 23                          | chr4:113981-5087478   | Yes |

|              |                      |  |
|--------------|----------------------|--|
| <i>LETM1</i> | chr4:1813206-1857974 |  |
| WHSCR2       | chr4:1345236-1945236 |  |
| WHSCR1       | chr4:1945236-2110236 |  |

### References for Supplementary Material

- 1 Battaglia A, Filippi T, Carey JC. Update on the clinical features and natural history of Wolf-Hirschhorn (4p-) syndrome: experience with 87 patients and recommendations for routine health supervision. *Am J Med Genet C Semin Med Genet* 2008;**148C**:246–51. doi:10.1002/ajmg.c.30187
- 2 Girirajan S, Rosenfeld JA, Cooper GM, *et al.* A recurrent 16p12.1 microdeletion supports a two-hit model for severe developmental delay. *Nat Genet* 2010;**42**:203–9. doi:10.1038/ng.534
- 3 Cooper GM, Coe BP, Girirajan S, *et al.* A copy number variation morbidity map of developmental delay. *Nat Genet* 2011;**43**:838–46. doi:10.1038/ng.909
- 4 Shaikh TH, Gai X, Perin JC, *et al.* High-resolution mapping and analysis of copy number variations in the human genome: a data resource for clinical and research applications. *Genome Res* 2009;**19**:1682–90. doi:10.1101/gr.083501.108
- 5 Girirajan S, Eichler EE. Phenotypic variability and genetic susceptibility to genomic disorders. *Hum Mol Genet* 2010;**19**:R176–87. doi:10.1093/hmg/ddq366
- 6 Itsara A, Cooper GM, Baker C, *et al.* Population analysis of large copy number variants and hotspots of human genetic disease. *Am J Hum Genet* 2009;**84**:148–61. doi:10.1016/j.ajhg.2008.12.014
- 7 Lenzini E, Ballarati L, Drigo P, *et al.* 1q44-qter trisomy: clinical report and review of the literature. *Genet Test Mol Biomark* 2009;**13**:79–86. doi:10.1089/gtmb.2008.0075
- 8 Villa N, Sala E, Colombo D, *et al.* Monosomy and trisomy 1q44-qter in two sisters originating from a half cryptic 1q;15p translocation. *J Med Genet* 2000;**37**:612–5.

- 9 Russell TA, Blizinsky KD, Cobia DJ, *et al.* A sequence variant in human KALRN impairs protein function and coincides with reduced cortical thickness. *Nat Commun* 2014;**5**:4858. doi:10.1038/ncomms5858
- 10 Benussi DG, Costa P, Zollino M, *et al.* Trisomy 12p and monosomy 4p: phenotype-genotype correlation. *Genet Test Mol Biomark* 2009;**13**:199–204.
- 11 Zollino M, Orteschi D, Ruiter M, *et al.* Unusual 4p16.3 deletions suggest an additional chromosome region for the Wolf-Hirschhorn syndrome-associated seizures disorder. *Epilepsia* 2014;**55**:849–57. doi:10.1111/epi.12617
- 12 Izumi K, Okuno H, Maeyama K, *et al.* Interstitial microdeletion of 4p16.3: contribution of WHSC1 haploinsufficiency to the pathogenesis of developmental delay in Wolf-Hirschhorn syndrome. *Am J Med Genet A* 2010;**152A**:1028–32. doi:10.1002/ajmg.a.33121
- 13 Van Buggenhout G, Melotte C, Dutta B, *et al.* Mild Wolf-Hirschhorn syndrome: micro-array CGH analysis of atypical 4p16.3 deletions enables refinement of the genotype-phenotype map. *J Med Genet* 2004;**41**:691–8. doi:10.1136/jmg.2003.016865
- 14 Shimizu K, Wakui K, Kosho T, *et al.* Microarray and FISH-based genotype-phenotype analysis of 22 Japanese patients with Wolf-Hirschhorn syndrome. *Am J Med Genet A* 2014;**164A**:597–609. doi:10.1002/ajmg.a.36308
- 15 Andersen EF, Carey JC, Earl DL, *et al.* Deletions involving genes WHSC1 and LETM1 may be necessary, but are not sufficient to cause Wolf-Hirschhorn Syndrome. *Eur J Hum Genet EJHG* 2014;**22**:464–70. doi:10.1038/ejhg.2013.192
- 16 Okamoto N, Ohmachi K, Shimada S, *et al.* 109 kb deletion of chromosome 4p16.3 in a patient with mild phenotype of Wolf-Hirschhorn syndrome. *Am J Med Genet A* 2013;**161A**:1465–9. doi:10.1002/ajmg.a.35910
- 17 Rauch A, Schellmoser S, Kraus C, *et al.* First known microdeletion within the Wolf-Hirschhorn syndrome critical region refines genotype-phenotype correlation. *Am J Med Genet* 2001;**99**:338–42.
- 18 Maas NMC, Van Buggenhout G, Hannes F, *et al.* Genotype-phenotype correlation in 21 patients with Wolf-Hirschhorn syndrome using high resolution array comparative genome hybridisation (CGH). *J Med Genet* 2008;**45**:71–80. doi:10.1136/jmg.2007.052910
- 19 Bayindir B, Piazza E, Della Mina E, *et al.* Dravet phenotype in a subject with a der(4)t(4;8)(p16.3;p23.3) without the involvement of the LETM1 gene. *Eur J Med Genet* 2013;**56**:551–5. doi:10.1016/j.ejmg.2013.08.003
